# Supplementary material
Source: publisher figshare collection journal article supplement (https://sage.figshare.com/ndownloader/files/18667406)
Supplement: Supplementary file 1 [file 18667406]

## Supplementary Material

### *Example video*

P-A+: The cube moves behind the occluder. Then the actor turns away from the table. While she is not looking, the cube moves out of the occluder and falls off the table (and out of the screen). The cube is last seen by the participant at 12.5s. Then the actor starts to turn towards the table at 15s. The occluder disappears at 17s. In this condition, the participant believes the target is absent but the actor has a false ‘target present’ belief;
